# Supplementary material for: Effects of Age, Sex, and Menopausal Status on Blood Cholesterol Profile in the Korean Population
Source: PubMed Central journal article supplement — Korean Circ J. 2015 Mar 24;45(2):141–8. doi: 10.4070/kcj.2015.45.2.141 (PMC4372980; doi:10.4070/kcj.2015.45.2.141), 2015-03-24
Supplement: kcj-45-141-s002.pdf [file kcj-45-141-s002.pdf]

**Supplementary Table 2.** Distribution of total cholesterol (mg/dL) by age, sex, menopausal status not excluding people taking lipid-lowering agents

| Age                            | Number | Mean  | Standard deviation | Percentiles |      |      |      |      |      |      |
|--------------------------------|--------|-------|--------------------|-------------|------|------|------|------|------|------|
|                                |        |       |                    | 5th         | 10th | 25th | 50th | 75th | 90th | 95th |
| Male (n=8656)                  |        |       |                    |             |      |      |      |      |      |      |
| 10-14                          | 788    | 156.9 | 26.6               | 117         | 125  | 139  | 156  | 172  | 191  | 204  |
| 15-19                          | 566    | 151.1 | 27.3               | 114         | 121  | 133  | 147  | 167  | 184  | 196  |
| 20-24                          | 327    | 167.9 | 29.7               | 129         | 134  | 147  | 164  | 187  | 213  | 220  |
| 25-29                          | 432    | 179.2 | 31.6               | 129         | 141  | 158  | 178  | 198  | 222  | 234  |
| 30-34                          | 550    | 188.4 | 34.2               | 135         | 146  | 166  | 186  | 210  | 230  | 246  |
| 35-39                          | 773    | 193.7 | 33.4               | 142         | 153  | 170  | 192  | 213  | 239  | 255  |
| 40-44                          | 742    | 193.5 | 35.7               | 139         | 152  | 171  | 192  | 216  | 237  | 247  |
| 45-49                          | 640    | 196.3 | 38.6               | 139         | 150  | 173  | 192  | 218  | 242  | 261  |
| 50-54                          | 704    | 195.1 | 35.3               | 141         | 152  | 171  | 194  | 216  | 238  | 250  |
| 55-59                          | 691    | 190.0 | 37.6               | 131         | 142  | 166  | 188  | 214  | 235  | 254  |
| 60-64                          | 714    | 185.6 | 34.7               | 129         | 141  | 161  | 185  | 211  | 230  | 241  |
| 65-69                          | 621    | 181.4 | 33.0               | 128         | 141  | 161  | 181  | 200  | 224  | 238  |
| 70-74                          | 611    | 182.2 | 34.9               | 126         | 139  | 159  | 179  | 204  | 225  | 241  |
| 75-79                          | 360    | 178.6 | 33.9               | 126         | 139  | 157  | 178  | 196  | 222  | 240  |
| 80+                            | 137    | 173.2 | 33.4               | 120         | 130  | 148  | 173  | 196  | 217  | 232  |
| Premenopausal female (n=5869)  |        |       |                    |             |      |      |      |      |      |      |
| 10-14                          | 675    | 163.8 | 25.3               | 125         | 133  | 147  | 163  | 178  | 198  | 210  |
| 15-19                          | 524    | 162.3 | 26.3               | 125         | 132  | 144  | 159  | 178  | 196  | 211  |
| 20-24                          | 470    | 167.2 | 28.5               | 124         | 133  | 148  | 164  | 184  | 203  | 216  |
| 25-29                          | 593    | 174.1 | 31.0               | 130         | 141  | 153  | 170  | 191  | 214  | 231  |
| 30-34                          | 790    | 176.9 | 32.9               | 129         | 139  | 154  | 174  | 195  | 220  | 236  |
| 35-39                          | 1043   | 180.3 | 32.5               | 136         | 142  | 158  | 178  | 199  | 219  | 233  |
| 40-44                          | 850    | 182.9 | 31.4               | 137         | 144  | 161  | 181  | 201  | 225  | 241  |
| 45-49                          | 645    | 193.6 | 33.4               | 143         | 152  | 172  | 192  | 213  | 234  | 253  |
| 50-54                          | 279    | 200.7 | 33.4               | 153         | 160  | 177  | 200  | 223  | 246  | 260  |
| Postmenopausal female (n=3909) |        |       |                    |             |      |      |      |      |      |      |
| 45-49                          | 119    | 193.5 | 32.3               | 139         | 152  | 175  | 190  | 211  | 230  | 254  |
| 50-54                          | 617    | 207.6 | 36.2               | 154         | 164  | 184  | 206  | 226  | 255  | 273  |
| 55-59                          | 670    | 206.8 | 37.9               | 145         | 160  | 180  | 206  | 232  | 255  | 271  |
| 60-64                          | 648    | 202.7 | 36.5               | 144         | 155  | 177  | 201  | 226  | 248  | 263  |
| 65-69                          | 578    | 199.7 | 36.9               | 143         | 154  | 172  | 198  | 223  | 247  | 263  |
| 70-74                          | 638    | 197.9 | 37.1               | 138         | 150  | 173  | 197  | 221  | 247  | 264  |
| 75-79                          | 441    | 195.4 | 37.5               | 140         | 151  | 168  | 195  | 217  | 242  | 260  |
| 80+                            | 198    | 197.2 | 35.7               | 144         | 156  | 170  | 196  | 216  | 243  | 269  |
