# Supplementary material for: Effects of Age, Sex, and Menopausal Status on Blood Cholesterol Profile in the Korean Population
Source: PubMed Central journal article supplement — Korean Circ J. 2015 Mar 24;45(2):141–8. doi: 10.4070/kcj.2015.45.2.141 (PMC4372980; doi:10.4070/kcj.2015.45.2.141), 2015-03-24
Supplement: kcj-45-141-s004.pdf [file kcj-45-141-s004.pdf]

**Supplementary Table 4.** Distribution of triglycerides (mg/dL) by age, sex, menopausal status not excluding people taking lipid-lowering agents

| Age                            | Number | Mean  | Standard deviation | Percentiles |      |      |      |      |      |      |
|--------------------------------|--------|-------|--------------------|-------------|------|------|------|------|------|------|
|                                |        |       |                    | 5th         | 10th | 25th | 50th | 75th | 90th | 95th |
| Male (n=8656)                  |        |       |                    |             |      |      |      |      |      |      |
| 10-14                          | 788    | 77.9  | 44.3               | 30          | 36   | 47   | 66   | 96   | 138  | 169  |
| 15-19                          | 566    | 83.6  | 44.3               | 37          | 42   | 55   | 74   | 98   | 143  | 175  |
| 20-24                          | 327    | 94.9  | 53.7               | 39          | 45   | 60   | 84   | 109  | 167  | 207  |
| 25-29                          | 432    | 130.8 | 104.8              | 47          | 54   | 74   | 104  | 150  | 221  | 297  |
| 30-34                          | 550    | 144.2 | 100.7              | 49          | 57   | 81   | 115  | 182  | 253  | 306  |
| 35-39                          | 773    | 151.8 | 90.7               | 54          | 65   | 90   | 130  | 190  | 268  | 316  |
| 40-44                          | 742    | 162.6 | 99.0               | 58          | 69   | 93   | 137  | 206  | 288  | 335  |
| 45-49                          | 640    | 165.4 | 114.6              | 52          | 68   | 94.5 | 139  | 201  | 303  | 348  |
| 50-54                          | 704    | 166.6 | 102.2              | 58          | 68   | 96.5 | 139  | 205  | 302  | 355  |
| 55-59                          | 691    | 159.3 | 103.7              | 53          | 66   | 95   | 136  | 200  | 274  | 326  |
| 60-64                          | 714    | 145.8 | 84.6               | 50          | 59   | 86   | 128  | 186  | 253  | 316  |
| 65-69                          | 621    | 135.4 | 76.2               | 47          | 61   | 83   | 118  | 166  | 240  | 279  |
| 70-74                          | 611    | 129.7 | 71.7               | 49          | 57   | 77   | 111  | 162  | 226  | 274  |
| 75-79                          | 360    | 120.2 | 70.2               | 47.5        | 55   | 73   | 104  | 144  | 215  | 258  |
| 80+                            | 137    | 106.2 | 49.4               | 51          | 55   | 66   | 98   | 132  | 166  | 210  |
| Premenopausal female (n=5869)  |        |       |                    |             |      |      |      |      |      |      |
| 10-14                          | 675    | 89.5  | 48.5               | 38          | 44   | 58   | 78   | 107  | 149  | 191  |
| 15-19                          | 524    | 77.4  | 40.4               | 34          | 41   | 51   | 68   | 91   | 126  | 156  |
| 20-24                          | 470    | 75.7  | 43.5               | 34          | 39.5 | 51   | 66   | 88   | 118  | 146  |
| 25-29                          | 593    | 85.5  | 57.9               | 34          | 39   | 53   | 69   | 100  | 145  | 195  |
| 30-34                          | 790    | 88.5  | 54.3               | 34          | 39   | 53   | 72   | 108  | 152  | 194  |
| 35-39                          | 1043   | 91.8  | 57.8               | 36          | 42   | 56   | 75   | 110  | 153  | 194  |
| 40-44                          | 850    | 95.5  | 55.7               | 41          | 47   | 60   | 80   | 116  | 160  | 198  |
| 45-49                          | 645    | 110.6 | 68.9               | 43          | 49   | 67   | 93   | 129  | 193  | 246  |
| 50-54                          | 279    | 109.2 | 57.9               | 46          | 51   | 68   | 94   | 135  | 191  | 221  |
| Postmenopausal female (n=3909) |        |       |                    |             |      |      |      |      |      |      |
| 45-49                          | 119    | 117.2 | 76.1               | 38          | 46   | 64   | 93   | 159  | 229  | 310  |
| 50-54                          | 617    | 128.9 | 76.7               | 47          | 56   | 74   | 109  | 157  | 234  | 287  |
| 55-59                          | 670    | 130.2 | 76.8               | 46          | 57.5 | 78   | 112  | 167  | 221  | 270  |
| 60-64                          | 648    | 135.9 | 74.2               | 55          | 63   | 82   | 117  | 167  | 241  | 273  |
| 65-69                          | 578    | 143.3 | 73.8               | 56          | 66   | 89   | 126  | 180  | 252  | 293  |
| 70-74                          | 638    | 137.7 | 77.4               | 51          | 63   | 86   | 123  | 175  | 230  | 263  |
| 75-79                          | 441    | 132.8 | 67.1               | 56          | 66   | 87   | 118  | 164  | 218  | 250  |
| 80+                            | 198    | 141.9 | 66.7               | 63          | 74   | 95   | 125  | 173  | 248  | 290  |
