# Supplementary material for: Effects of Age, Sex, and Menopausal Status on Blood Cholesterol Profile in the Korean Population
Source: PubMed Central journal article supplement — Korean Circ J. 2015 Mar 24;45(2):141–8. doi: 10.4070/kcj.2015.45.2.141 (PMC4372980; doi:10.4070/kcj.2015.45.2.141), 2015-03-24
Supplement: kcj-45-141-s005.pdf [file kcj-45-141-s005.pdf]

**Supplementary Table 5.** Distribution of high density lipoprotein-cholesterol (mg/dL) by age, sex, menopausal status

| Age                            | Number | Mean | Standard deviation | Percentiles |      |      |      |      |      |      |
|--------------------------------|--------|------|--------------------|-------------|------|------|------|------|------|------|
|                                |        |      |                    | 5th         | 10th | 25th | 50th | 75th | 90th | 95th |
| Male (n=8284)                  |        |      |                    |             |      |      |      |      |      |      |
| 10-14                          | 788    | 54.4 | 10.9               | 37          | 41   | 47   | 53   | 62   | 69   | 74   |
| 15-19                          | 566    | 50.3 | 9.7                | 36          | 39   | 44   | 49   | 56   | 63   | 68   |
| 20-24                          | 327    | 53.2 | 11.6               | 38          | 40   | 45   | 52   | 59   | 69   | 74   |
| 25-29                          | 431    | 50.5 | 11.5               | 35          | 38   | 42   | 49   | 57   | 65   | 71   |
| 30-34                          | 548    | 49.4 | 11.1               | 34          | 37   | 41   | 48   | 56   | 65   | 71   |
| 35-39                          | 765    | 49.8 | 11.5               | 34          | 37   | 42   | 48   | 56   | 65   | 70   |
| 40-44                          | 729    | 48.7 | 10.8               | 34          | 36   | 40   | 48   | 55   | 63   | 69   |
| 45-49                          | 617    | 48.5 | 11.5               | 33          | 36   | 41   | 47   | 55   | 62   | 69   |
| 50-54                          | 659    | 49.4 | 12.2               | 34          | 36   | 41   | 47   | 56   | 65   | 73   |
| 55-59                          | 631    | 48.9 | 12.2               | 33          | 35   | 40   | 47   | 55   | 65   | 73   |
| 60-64                          | 643    | 50.0 | 13.1               | 34          | 36   | 40   | 48   | 57   | 67   | 76   |
| 65-69                          | 554    | 48.9 | 12.9               | 32          | 35   | 40   | 46.5 | 56   | 66   | 74   |
| 70-74                          | 559    | 48.9 | 12.7               | 32          | 34   | 40   | 47   | 56   | 65   | 72   |
| 75-79                          | 339    | 48.6 | 12.5               | 31          | 34   | 40   | 47   | 55   | 65   | 72   |
| 80+                            | 128    | 47.6 | 12.9               | 30          | 32   | 38   | 44   | 57   | 69   | 72   |
| Premenopausal female (n=5841)  |        |      |                    |             |      |      |      |      |      |      |
| 10-14                          | 675    | 54.7 | 10.5               | 39          | 42   | 47   | 54   | 61   | 68   | 73   |
| 15-19                          | 524    | 57.0 | 10.9               | 40          | 44   | 49.5 | 56   | 64   | 70   | 75   |
| 20-24                          | 470    | 59.9 | 12.9               | 42          | 46   | 51   | 58   | 67   | 77   | 83   |
| 25-29                          | 593    | 60.0 | 13.0               | 40          | 43   | 51   | 59   | 68   | 77   | 82   |
| 30-34                          | 790    | 58.6 | 13.1               | 39          | 42   | 49   | 58   | 67   | 76   | 81   |
| 35-39                          | 1039   | 57.4 | 12.2               | 39          | 43   | 49   | 57   | 65   | 73   | 79   |
| 40-44                          | 843    | 55.9 | 12.7               | 39          | 42   | 47   | 55   | 63   | 71   | 77   |
| 45-49                          | 633    | 56.6 | 11.8               | 39          | 43   | 48   | 56   | 64   | 72   | 78   |
| 50-54                          | 274    | 55.9 | 12.9               | 37          | 40   | 47   | 54   | 63   | 71   | 80   |
| Postmenopausal female (n=3405) |        |      |                    |             |      |      |      |      |      |      |
| 45-49                          | 113    | 55.2 | 12.7               | 34          | 38   | 46   | 56   | 63   | 70   | 76   |
| 50-54                          | 578    | 56.0 | 13.2               | 38          | 40   | 47   | 55   | 63   | 73   | 79   |
| 55-59                          | 590    | 53.4 | 11.9               | 37          | 39   | 44   | 52   | 61   | 69   | 73   |
| 60-64                          | 540    | 52.1 | 12.3               | 35          | 37   | 43   | 51   | 59   | 69   | 75   |
| 65-69                          | 466    | 51.6 | 11.4               | 35          | 38   | 44   | 50   | 59   | 67   | 71   |
| 70-74                          | 542    | 50.7 | 12.1               | 34          | 37   | 42   | 49   | 57   | 66   | 73   |
| 75-79                          | 387    | 50.0 | 11.3               | 33          | 36   | 42   | 49   | 57   | 64   | 69   |
| 80+                            | 189    | 47.9 | 10.4               | 34          | 36   | 40   | 47   | 54   | 61   | 68   |
