# Supplementary material for: Effects of Age, Sex, and Menopausal Status on Blood Cholesterol Profile in the Korean Population
Source: PubMed Central journal article supplement — Korean Circ J. 2015 Mar 24;45(2):141–8. doi: 10.4070/kcj.2015.45.2.141 (PMC4372980; doi:10.4070/kcj.2015.45.2.141), 2015-03-24
Supplement: kcj-45-141-s007.pdf [file kcj-45-141-s007.pdf]

**Supplementary Table 7.** Distribution of low density lipoprotein-cholesterol (mg/dL) by age, sex, menopausal status

| Age                            | Number | Mean  | Standard deviation | Percentiles |      |      |      |      |      |      |
|--------------------------------|--------|-------|--------------------|-------------|------|------|------|------|------|------|
|                                |        |       |                    | 5th         | 10th | 25th | 50th | 75th | 90th | 95th |
| Male (n=8284)                  |        |       |                    |             |      |      |      |      |      |      |
| 10-14                          | 788    | 86.9  | 22.4               | 53          | 61   | 72   | 85   | 100  | 116  | 126  |
| 15-19                          | 566    | 84.1  | 24.0               | 50          | 57   | 69   | 82   | 98   | 113  | 124  |
| 20-24                          | 327    | 95.7  | 26.2               | 60          | 65   | 76   | 91   | 111  | 131  | 145  |
| 25-29                          | 431    | 103.6 | 28.0               | 60          | 67   | 86   | 103  | 120  | 140  | 153  |
| 30-34                          | 548    | 111.2 | 31.4               | 67          | 74   | 91   | 110  | 128  | 147  | 163  |
| 35-39                          | 765    | 114.3 | 30.2               | 68          | 78   | 94   | 113  | 133  | 154  | 168  |
| 40-44                          | 729    | 113.4 | 32.0               | 64          | 75   | 92   | 114  | 132  | 154  | 166  |
| 45-49                          | 617    | 116.4 | 34.3               | 63          | 75   | 94   | 116  | 137  | 156  | 174  |
| 50-54                          | 659    | 114.1 | 31.6               | 65          | 77   | 91   | 114  | 133  | 155  | 168  |
| 55-59                          | 631    | 111.9 | 33.8               | 60          | 71   | 91   | 109  | 132  | 155  | 170  |
| 60-64                          | 643    | 108.9 | 32.4               | 55          | 68   | 88   | 107  | 130  | 153  | 164  |
| 65-69                          | 554    | 108.7 | 30.6               | 56          | 71   | 89   | 109  | 127  | 147  | 159  |
| 70-74                          | 559    | 109.0 | 31.1               | 59          | 71   | 87   | 108  | 129  | 146  | 162  |
| 75-79                          | 339    | 107.3 | 31.1               | 57          | 67   | 88   | 107  | 127  | 147  | 160  |
| 80+                            | 128    | 104.7 | 29.2               | 60          | 66   | 83   | 104  | 124  | 142  | 159  |
| Premenopausal female (n=5841)  |        |       |                    |             |      |      |      |      |      |      |
| 10-14                          | 675    | 91.2  | 21.9               | 58          | 64   | 77   | 89   | 105  | 121  | 130  |
| 15-19                          | 524    | 89.9  | 22.4               | 58          | 63   | 74   | 88   | 102  | 119  | 130  |
| 20-24                          | 470    | 92.1  | 24.2               | 57          | 64   | 76   | 89   | 106  | 123  | 134  |
| 25-29                          | 593    | 97.1  | 25.9               | 61          | 69   | 81   | 93   | 110  | 131  | 144  |
| 30-34                          | 790    | 100.7 | 27.2               | 63          | 68   | 81   | 97   | 117  | 135  | 149  |
| 35-39                          | 1039   | 104.6 | 28.2               | 65          | 73   | 85   | 102  | 121  | 141  | 154  |
| 40-44                          | 843    | 108.3 | 26.6               | 68          | 75   | 89   | 107  | 124  | 144  | 157  |
| 45-49                          | 633    | 115.8 | 29.7               | 72          | 80   | 95   | 115  | 132  | 151  | 165  |
| 50-54                          | 274    | 123.1 | 28.3               | 78          | 89   | 103  | 123  | 140  | 160  | 175  |
| Postmenopausal female (n=3405) |        |       |                    |             |      |      |      |      |      |      |
| 45-49                          | 113    | 116.7 | 29.8               | 68          | 86   | 97   | 115  | 134  | 151  | 176  |
| 50-54                          | 578    | 127.4 | 31.6               | 78          | 90   | 106  | 126  | 144  | 168  | 183  |
| 55-59                          | 590    | 131.0 | 33.0               | 78          | 89   | 109  | 130  | 154  | 173  | 188  |
| 60-64                          | 540    | 127.6 | 31.9               | 75          | 86   | 105  | 127  | 148  | 168  | 181  |
| 65-69                          | 466    | 125.5 | 32.4               | 76          | 83   | 104  | 125  | 145  | 168  | 180  |
| 70-74                          | 542    | 123.1 | 32.4               | 70          | 82   | 101  | 123  | 146  | 165  | 177  |
| 75-79                          | 387    | 121.7 | 33.2               | 72          | 81   | 98   | 119  | 143  | 164  | 178  |
| 80+                            | 189    | 121.4 | 32.7               | 71          | 81   | 98   | 120  | 138  | 166  | 185  |
