# Supplementary material for: Effects of Age, Sex, and Menopausal Status on Blood Cholesterol Profile in the Korean Population
Source: PubMed Central journal article supplement — Korean Circ J. 2015 Mar 24;45(2):141–8. doi: 10.4070/kcj.2015.45.2.141 (PMC4372980; doi:10.4070/kcj.2015.45.2.141), 2015-03-24
Supplement: kcj-45-141-s009.pdf [file kcj-45-141-s009.pdf]

**Supplementary Table 9.** Distribution of total cholesterol/high density lipoprotein-cholesterol ratio by age, sex, menopausal status

| Age                            | Number | Mean | Standard deviation | Percentiles |      |      |      |      |      |      |
|--------------------------------|--------|------|--------------------|-------------|------|------|------|------|------|------|
|                                |        |      |                    | 5th         | 10th | 25th | 50th | 75th | 90th | 95th |
| Male (n=8284)                  |        |      |                    |             |      |      |      |      |      |      |
| 10-14                          | 788    | 2.97 | 0.65               | 2.10        | 2.23 | 2.50 | 2.85 | 3.33 | 3.89 | 4.19 |
| 15-19                          | 566    | 3.09 | 0.72               | 2.17        | 2.28 | 2.62 | 2.98 | 3.43 | 3.97 | 4.44 |
| 20-24                          | 327    | 3.28 | 0.87               | 2.14        | 2.32 | 2.68 | 3.12 | 3.74 | 4.36 | 4.98 |
| 25-29                          | 431    | 3.71 | 1.01               | 2.30        | 2.52 | 2.98 | 3.57 | 4.31 | 5.08 | 5.63 |
| 30-34                          | 548    | 3.99 | 1.10               | 2.41        | 2.67 | 3.20 | 3.84 | 4.65 | 5.50 | 5.88 |
| 35-39                          | 765    | 4.08 | 1.10               | 2.48        | 2.72 | 3.26 | 4.02 | 4.76 | 5.52 | 6.06 |
| 40-44                          | 729    | 4.16 | 1.13               | 2.56        | 2.79 | 3.35 | 4.05 | 4.87 | 5.65 | 6.10 |
| 45-49                          | 617    | 4.24 | 1.12               | 2.61        | 2.91 | 3.45 | 4.14 | 4.92 | 5.74 | 6.13 |
| 50-54                          | 659    | 4.16 | 1.09               | 2.59        | 2.87 | 3.36 | 4.05 | 4.79 | 5.62 | 6.13 |
| 55-59                          | 631    | 4.12 | 1.13               | 2.44        | 2.75 | 3.30 | 4.00 | 4.78 | 5.56 | 6.08 |
| 60-64                          | 643    | 3.94 | 1.06               | 2.43        | 2.65 | 3.12 | 3.84 | 4.66 | 5.33 | 5.72 |
| 65-69                          | 554    | 3.96 | 1.06               | 2.40        | 2.60 | 3.18 | 3.89 | 4.72 | 5.37 | 5.74 |
| 70-74                          | 559    | 3.96 | 1.13               | 2.45        | 2.65 | 3.08 | 3.84 | 4.64 | 5.43 | 5.96 |
| 75-79                          | 339    | 3.90 | 1.09               | 2.40        | 2.61 | 3.05 | 3.74 | 4.58 | 5.30 | 5.97 |
| 80+                            | 128    | 3.85 | 1.13               | 2.35        | 2.54 | 3.05 | 3.71 | 4.25 | 5.47 | 6.48 |
| Premenopausal female (n=5841)  |        |      |                    |             |      |      |      |      |      |      |
| 10-14                          | 675    | 3.08 | 0.66               | 2.26        | 2.41 | 2.61 | 2.97 | 3.40 | 3.91 | 4.35 |
| 15-19                          | 524    | 2.93 | 0.68               | 2.09        | 2.21 | 2.49 | 2.81 | 3.23 | 3.77 | 4.19 |
| 20-24                          | 470    | 2.88 | 0.67               | 2.07        | 2.21 | 2.43 | 2.78 | 3.17 | 3.69 | 4.26 |
| 25-29                          | 593    | 3.01 | 0.78               | 2.08        | 2.24 | 2.52 | 2.84 | 3.34 | 4.00 | 4.53 |
| 30-34                          | 790    | 3.14 | 0.78               | 2.16        | 2.28 | 2.56 | 2.98 | 3.56 | 4.15 | 4.70 |
| 35-39                          | 1039   | 3.25 | 0.82               | 2.27        | 2.41 | 2.66 | 3.08 | 3.66 | 4.35 | 4.84 |
| 40-44                          | 843    | 3.40 | 0.80               | 2.32        | 2.47 | 2.81 | 3.27 | 3.88 | 4.50 | 4.85 |
| 45-49                          | 633    | 3.56 | 0.88               | 2.40        | 2.57 | 2.91 | 3.41 | 4.07 | 4.71 | 5.23 |
| 50-54                          | 274    | 3.72 | 0.85               | 2.51        | 2.71 | 3.09 | 3.62 | 4.26 | 4.93 | 5.31 |
| Postmenopausal female (n=3405) |        |      |                    |             |      |      |      |      |      |      |
| 45-49                          | 113    | 3.69 | 0.91               | 2.39        | 2.56 | 3.02 | 3.61 | 4.23 | 4.87 | 5.49 |
| 50-54                          | 578    | 3.90 | 1.03               | 2.56        | 2.74 | 3.11 | 3.70 | 4.46 | 5.36 | 5.91 |
| 55-59                          | 590    | 4.08 | 0.99               | 2.59        | 2.89 | 3.42 | 3.97 | 4.66 | 5.32 | 5.85 |
| 60-64                          | 540    | 4.14 | 1.02               | 2.63        | 2.86 | 3.32 | 4.08 | 4.85 | 5.57 | 5.96 |
| 65-69                          | 466    | 4.15 | 1.04               | 2.61        | 2.90 | 3.38 | 4.03 | 4.76 | 5.63 | 6.07 |
| 70-74                          | 542    | 4.15 | 1.08               | 2.59        | 2.80 | 3.33 | 4.06 | 4.88 | 5.53 | 6.03 |
| 75-79                          | 387    | 4.14 | 1.09               | 2.68        | 2.91 | 3.39 | 4.02 | 4.73 | 5.59 | 6.03 |
| 80+                            | 189    | 4.27 | 1.03               | 2.84        | 3.03 | 3.50 | 4.16 | 4.90 | 5.60 | 6.03 |
