# Supplementary material for: Effects of Age, Sex, and Menopausal Status on Blood Cholesterol Profile in the Korean Population
Source: PubMed Central journal article supplement — Korean Circ J. 2015 Mar 24;45(2):141–8. doi: 10.4070/kcj.2015.45.2.141 (PMC4372980; doi:10.4070/kcj.2015.45.2.141), 2015-03-24
Supplement: kcj-45-141-s010.pdf [file kcj-45-141-s010.pdf]

**Supplementary Table 10.** Distribution of total cholesterol/high density lipoprotein-cholesterol ratio by age, sex, menopausal status not excluding people taking lipid-lowering agents

| Age                            | Number | Mean | Standard deviation | Percentiles |      |      |      |      |      |      |
|--------------------------------|--------|------|--------------------|-------------|------|------|------|------|------|------|
|                                |        |      |                    | 5th         | 10th | 25th | 50th | 75th | 90th | 95th |
| Male (n=8656)                  |        |      |                    |             |      |      |      |      |      |      |
| 10–14                          | 788    | 3.0  | 0.6                | 2.10        | 2.23 | 2.50 | 2.85 | 3.33 | 3.89 | 4.19 |
| 15–19                          | 566    | 3.1  | 0.7                | 2.17        | 2.28 | 2.62 | 2.98 | 3.43 | 3.97 | 4.44 |
| 20–24                          | 327    | 3.3  | 0.9                | 2.14        | 2.32 | 2.68 | 3.12 | 3.74 | 4.36 | 4.98 |
| 25–29                          | 432    | 3.7  | 1.0                | 2.30        | 2.52 | 2.98 | 3.57 | 4.32 | 5.12 | 5.64 |
| 30–34                          | 550    | 4.0  | 1.1                | 2.41        | 2.67 | 3.20 | 3.84 | 4.65 | 5.48 | 5.88 |
| 35–39                          | 773    | 4.1  | 1.1                | 2.48        | 2.72 | 3.27 | 4.02 | 4.76 | 5.51 | 6.06 |
| 40–44                          | 742    | 4.1  | 1.1                | 2.56        | 2.80 | 3.33 | 4.04 | 4.86 | 5.62 | 6.10 |
| 45–49                          | 640    | 4.2  | 1.1                | 2.61        | 2.90 | 3.45 | 4.13 | 4.89 | 5.73 | 6.13 |
| 50–54                          | 704    | 4.2  | 1.2                | 2.57        | 2.87 | 3.34 | 4.04 | 4.77 | 5.62 | 6.13 |
| 55–59                          | 691    | 4.1  | 1.1                | 2.40        | 2.71 | 3.25 | 3.94 | 4.74 | 5.51 | 6.06 |
| 60–64                          | 714    | 3.9  | 1.1                | 2.42        | 2.63 | 3.07 | 3.82 | 4.66 | 5.37 | 5.72 |
| 65–69                          | 621    | 3.9  | 1.1                | 2.37        | 2.58 | 3.14 | 3.81 | 4.67 | 5.31 | 5.72 |
| 70–74                          | 611    | 3.9  | 1.1                | 2.40        | 2.62 | 3.06 | 3.81 | 4.60 | 5.36 | 5.93 |
| 75–79                          | 360    | 3.9  | 1.1                | 2.40        | 2.58 | 3.02 | 3.72 | 4.58 | 5.32 | 5.99 |
| 80+                            | 137    | 3.8  | 1.1                | 2.32        | 2.52 | 3.03 | 3.62 | 4.23 | 5.32 | 6.48 |
| Premenopausal female (n=5869)  |        |      |                    |             |      |      |      |      |      |      |
| 10–14                          | 675    | 3.1  | 0.7                | 2.26        | 2.41 | 2.61 | 2.97 | 3.40 | 3.91 | 4.35 |
| 15–19                          | 524    | 2.9  | 0.7                | 2.09        | 2.21 | 2.49 | 2.81 | 3.23 | 3.77 | 4.19 |
| 20–24                          | 470    | 2.9  | 0.7                | 2.07        | 2.21 | 2.43 | 2.78 | 3.17 | 3.69 | 4.26 |
| 25–29                          | 593    | 3.0  | 0.8                | 2.08        | 2.24 | 2.52 | 2.84 | 3.34 | 4.00 | 4.53 |
| 30–34                          | 790    | 3.1  | 0.8                | 2.16        | 2.28 | 2.56 | 2.98 | 3.56 | 4.15 | 4.70 |
| 35–39                          | 1043   | 3.3  | 0.8                | 2.27        | 2.41 | 2.66 | 3.08 | 3.66 | 4.35 | 4.84 |
| 40–44                          | 850    | 3.4  | 0.8                | 2.31        | 2.47 | 2.81 | 3.27 | 3.88 | 4.51 | 4.87 |
| 45–49                          | 645    | 3.6  | 0.9                | 2.39        | 2.57 | 2.91 | 3.40 | 4.07 | 4.71 | 5.16 |
| 50–54                          | 279    | 3.7  | 0.9                | 2.50        | 2.69 | 3.08 | 3.61 | 4.26 | 4.95 | 5.31 |
| Postmenopausal female (n=3909) |        |      |                    |             |      |      |      |      |      |      |
| 45–49                          | 119    | 3.7  | 1.0                | 2.39        | 2.56 | 3.02 | 3.61 | 4.23 | 5.04 | 5.56 |
| 50–54                          | 617    | 3.9  | 1.0                | 2.51        | 2.70 | 3.08 | 3.66 | 4.44 | 5.36 | 5.90 |
| 55–59                          | 670    | 4.0  | 1.0                | 2.57        | 2.82 | 3.33 | 3.91 | 4.60 | 5.29 | 5.83 |
| 60–64                          | 648    | 4.0  | 1.0                | 2.55        | 2.79 | 3.24 | 3.95 | 4.72 | 5.44 | 5.85 |
| 65–69                          | 578    | 4.0  | 1.0                | 2.52        | 2.79 | 3.25 | 3.89 | 4.66 | 5.54 | 5.90 |
| 70–74                          | 638    | 4.1  | 1.1                | 2.49        | 2.74 | 3.22 | 3.97 | 4.78 | 5.50 | 5.98 |
| 75–79                          | 441    | 4.1  | 1.1                | 2.64        | 2.86 | 3.30 | 3.91 | 4.63 | 5.46 | 5.91 |
| 80+                            | 198    | 4.3  | 1.0                | 2.84        | 3.06 | 3.48 | 4.14 | 4.88 | 5.54 | 6.03 |
