# Supplementary material for: Effects of Age, Sex, and Menopausal Status on Blood Cholesterol Profile in the Korean Population
Source: PubMed Central journal article supplement — Korean Circ J. 2015 Mar 24;45(2):141–8. doi: 10.4070/kcj.2015.45.2.141 (PMC4372980; doi:10.4070/kcj.2015.45.2.141), 2015-03-24
Supplement: kcj-45-141-s011.pdf [file kcj-45-141-s011.pdf]

**Supplementary Table 11.** Distribution of low density lipoprotein-cholesterol/high density lipoprotein-cholesterol ratio by age, sex, menopausal status

| Age                            | Number | Mean | Standard deviation | Percentiles |      |      |      |      |      |      |
|--------------------------------|--------|------|--------------------|-------------|------|------|------|------|------|------|
|                                |        |      |                    | 5th         | 10th | 25th | 50th | 75th | 90th | 95th |
| Male (n=8284)                  |        |      |                    |             |      |      |      |      |      |      |
| 10-14                          | 788    | 1.66 | 0.52               | 0.91        | 1.04 | 1.29 | 1.59 | 1.97 | 2.38 | 2.62 |
| 15-19                          | 566    | 1.74 | 0.62               | 0.92        | 1.05 | 1.34 | 1.65 | 2.02 | 2.50 | 2.86 |
| 20-24                          | 327    | 1.89 | 0.70               | 0.99        | 1.12 | 1.40 | 1.77 | 2.28 | 2.75 | 3.14 |
| 25-29                          | 431    | 2.14 | 0.78               | 1.01        | 1.22 | 1.59 | 2.05 | 2.59 | 3.19 | 3.61 |
| 30-34                          | 553    | 2.34 | 0.86               | 1.03        | 1.37 | 1.76 | 2.23 | 2.82 | 3.33 | 3.81 |
| 35-39                          | 786    | 2.39 | 0.87               | 1.11        | 1.38 | 1.80 | 2.31 | 2.94 | 3.46 | 3.93 |
| 40-44                          | 740    | 2.41 | 0.88               | 1.14        | 1.38 | 1.81 | 2.34 | 2.97 | 3.52 | 3.95 |
| 45-49                          | 626    | 2.48 | 0.90               | 1.13        | 1.43 | 1.84 | 2.42 | 3.02 | 3.68 | 4.00 |
| 50-54                          | 673    | 2.39 | 0.89               | 1.07        | 1.42 | 1.79 | 2.33 | 2.88 | 3.59 | 4.07 |
| 55-59                          | 637    | 2.40 | 0.92               | 1.05        | 1.29 | 1.76 | 2.32 | 2.91 | 3.57 | 3.94 |
| 60-64                          | 648    | 2.29 | 0.86               | 1.05        | 1.29 | 1.63 | 2.22 | 2.82 | 3.48 | 3.79 |
| 65-69                          | 558    | 2.34 | 0.87               | 0.95        | 1.28 | 1.74 | 2.26 | 2.89 | 3.49 | 3.81 |
| 70-74                          | 563    | 2.37 | 0.92               | 1.10        | 1.30 | 1.70 | 2.27 | 2.91 | 3.62 | 3.97 |
| 75-79                          | 341    | 2.34 | 0.87               | 1.08        | 1.27 | 1.71 | 2.27 | 2.89 | 3.48 | 3.88 |
| 80+                            | 129    | 2.33 | 0.93               | 1.16        | 1.22 | 1.68 | 2.26 | 2.73 | 3.58 | 4.18 |
| Premenopausal female (n=5841)  |        |      |                    |             |      |      |      |      |      |      |
| 10-14                          | 675    | 1.72 | 0.52               | 1.01        | 1.15 | 1.37 | 1.64 | 2.00 | 2.39 | 2.68 |
| 15-19                          | 524    | 1.64 | 0.54               | 0.92        | 1.02 | 1.28 | 1.54 | 1.92 | 2.34 | 2.63 |
| 20-24                          | 470    | 1.61 | 0.56               | 0.88        | 1.00 | 1.22 | 1.54 | 1.88 | 2.29 | 2.79 |
| 25-29                          | 593    | 1.70 | 0.63               | 0.92        | 1.05 | 1.29 | 1.60 | 2.02 | 2.44 | 2.81 |
| 30-34                          | 790    | 1.80 | 0.63               | 0.97        | 1.10 | 1.35 | 1.72 | 2.17 | 2.59 | 3.04 |
| 35-39                          | 1039   | 1.91 | 0.67               | 1.05        | 1.19 | 1.44 | 1.80 | 2.23 | 2.81 | 3.12 |
| 40-44                          | 843    | 2.03 | 0.65               | 1.12        | 1.27 | 1.56 | 1.95 | 2.40 | 2.89 | 3.23 |
| 45-49                          | 633    | 2.13 | 0.71               | 1.13        | 1.33 | 1.63 | 2.05 | 2.55 | 3.05 | 3.44 |
| 50-54                          | 274    | 2.29 | 0.67               | 1.32        | 1.47 | 1.79 | 2.21 | 2.78 | 3.21 | 3.42 |
| Postmenopausal female (n=3405) |        |      |                    |             |      |      |      |      |      |      |
| 45-49                          | 113    | 2.22 | 0.70               | 1.14        | 1.31 | 1.74 | 2.23 | 2.64 | 3.16 | 3.43 |
| 50-54                          | 578    | 2.39 | 0.80               | 1.32        | 1.47 | 1.80 | 2.29 | 2.85 | 3.44 | 3.76 |
| 55-59                          | 590    | 2.55 | 0.79               | 1.36        | 1.60 | 2.02 | 2.49 | 3.01 | 3.55 | 3.97 |
| 60-64                          | 540    | 2.57 | 0.81               | 1.31        | 1.54 | 1.94 | 2.55 | 3.10 | 3.68 | 3.99 |
| 65-69                          | 466    | 2.53 | 0.81               | 1.36        | 1.53 | 1.99 | 2.45 | 3.00 | 3.64 | 4.02 |
| 70-74                          | 542    | 2.55 | 0.86               | 1.29        | 1.50 | 1.90 | 2.47 | 3.09 | 3.67 | 4.14 |
| 75-79                          | 387    | 2.54 | 0.85               | 1.32        | 1.61 | 1.95 | 2.48 | 2.98 | 3.73 | 4.01 |
| 80+                            | 189    | 2.63 | 0.84               | 1.40        | 1.68 | 2.04 | 2.50 | 3.21 | 3.68 | 4.14 |
